# Supplementary material for: Confined self-assembly of SiOC nanospheres in graphene film to achieve cycle stability of lithium ion batteries
Source: Royal Society of Chemistry journal article supplement (doi:10.1039/d1nj06229h), 2022-01-01
Supplement: d1nj06229h1.pdf [file d1nj06229h1.pdf]

## **Confined self-assembly of SiOC nanospheres in graphene film to achieve cycle stability of lithium-ion batteries**

Wuming Liu,<sup>#a</sup> Miaomiao Jiang,<sup>#a</sup> Fangzhou Zhang,<sup>a</sup> Xinqi Chen,<sup>\*b</sup> and Jianping Yang<sup>\*a</sup>

<sup>a</sup> State Key Laboratory for Modification of Chemical Fibers and Polymer Materials, College of Materials Science and Engineering, Donghua University, Shanghai 201620, China

<sup>b</sup> Hubei Engineering Technology Research Center of Environmental Purification Materials, Institute of Materials Research and Engineering, Hubei University of Education, Wuhan, China

Email: chenxinqi@hue.edu.cn; jianpingyang@dhu.edu.cn

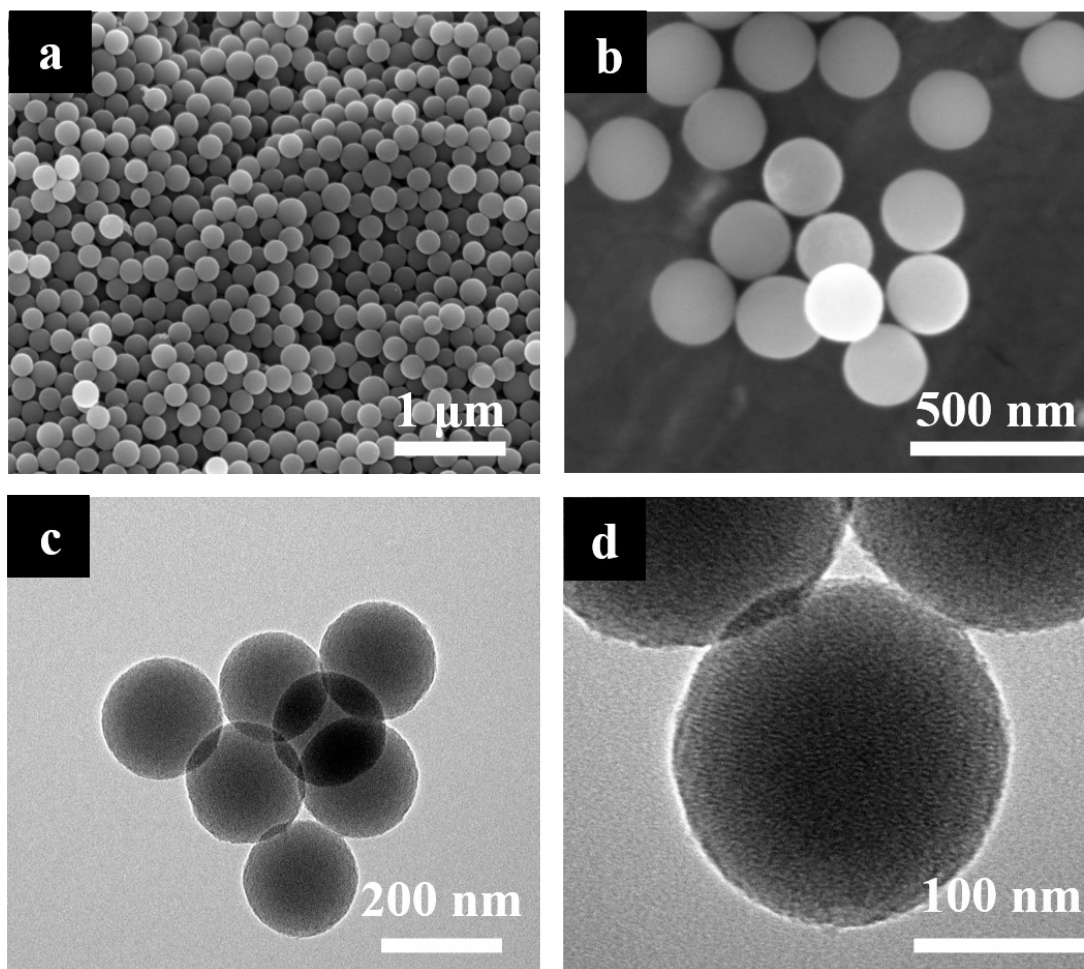

**Figure S1.** (a, b) FESEM images and (c, d) TEM images of SiOC nanospheres.

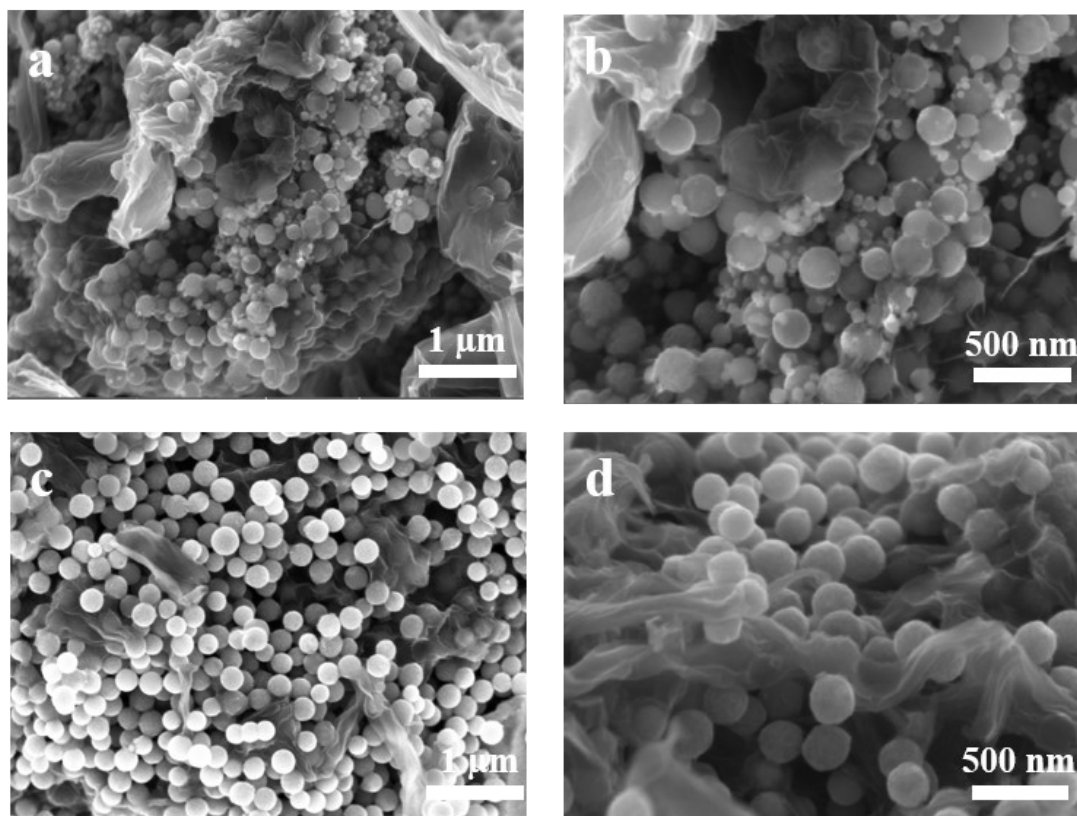

**Figure S2.** (a, b) FESEM images of the CA-SiOC@G hierarchical structure and (c, d) VC-SiOC@G hierarchical structure.

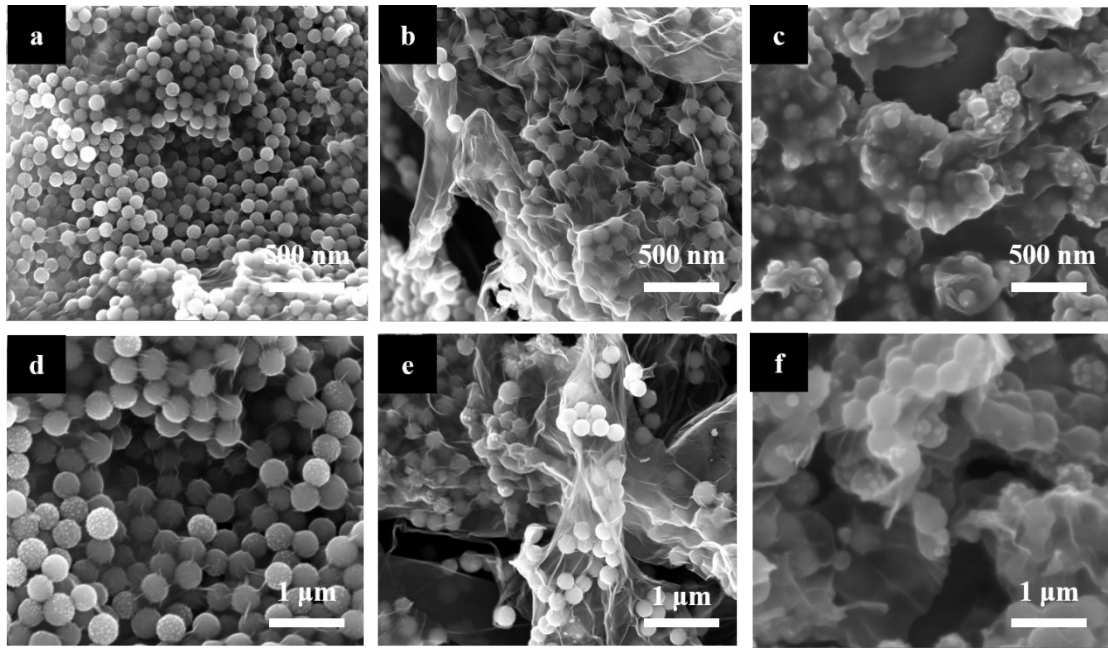

**Figure S3.** FESEM image of B-SiOC@G hierarchical structure prepared with different SiOC and GO mass ratios, (a, d) graphene: SiOC=1: 10, (b, e) graphene: SiOC=2: 10, (c, f) graphene: SiOC=4: 10.

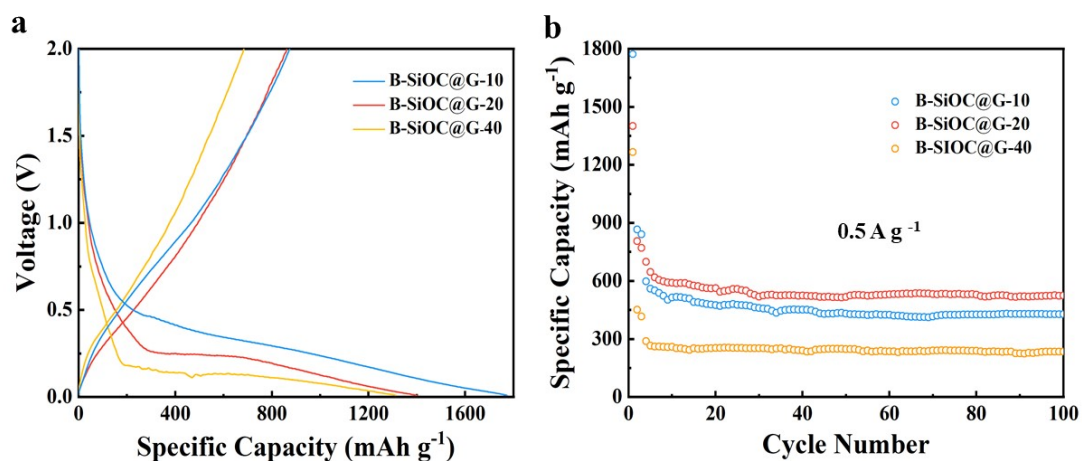

**Figure S4.** (a) First discharge/charge curves of B-SiOC@G prepared by different SiOC and graphene mass ratios, (b) cycle performance at 0.5 A g<sup>-1</sup> current density. With the ratio of graphene and SiOC changes to 1:10, 2:10, 5:10, named as B-SiOC@G-10, B-SiOC@G-20, B-SiOC@G-40, respectively.

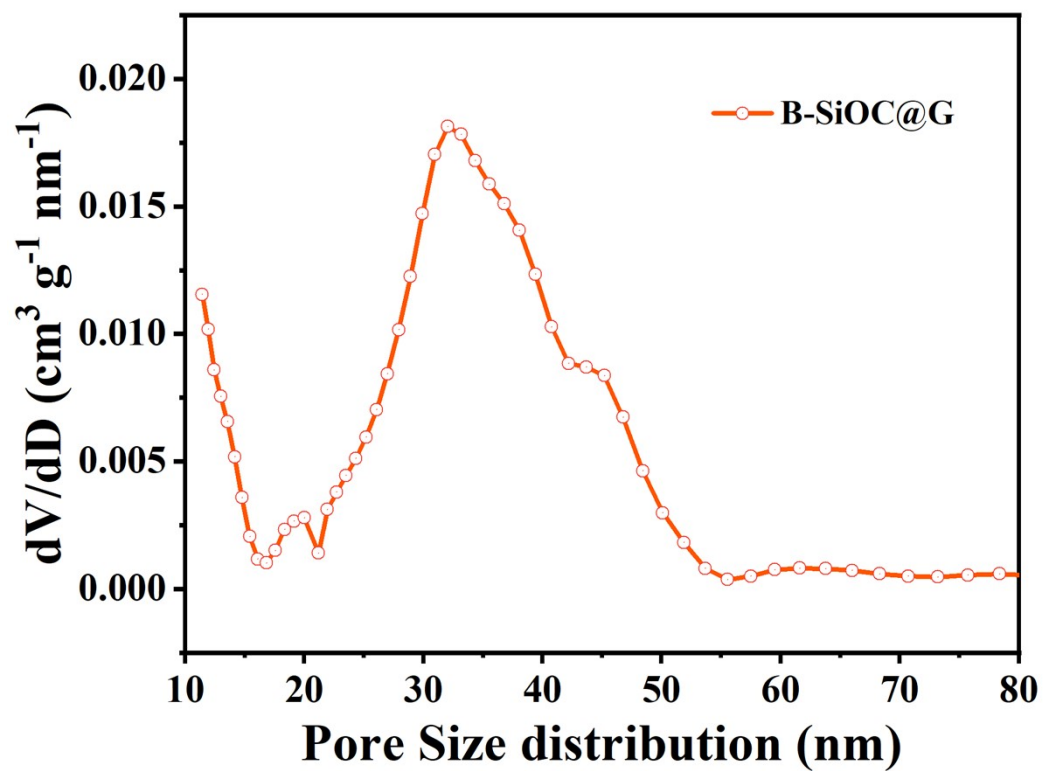

Figure S5. The pore size distribution of B-SiOC@G.

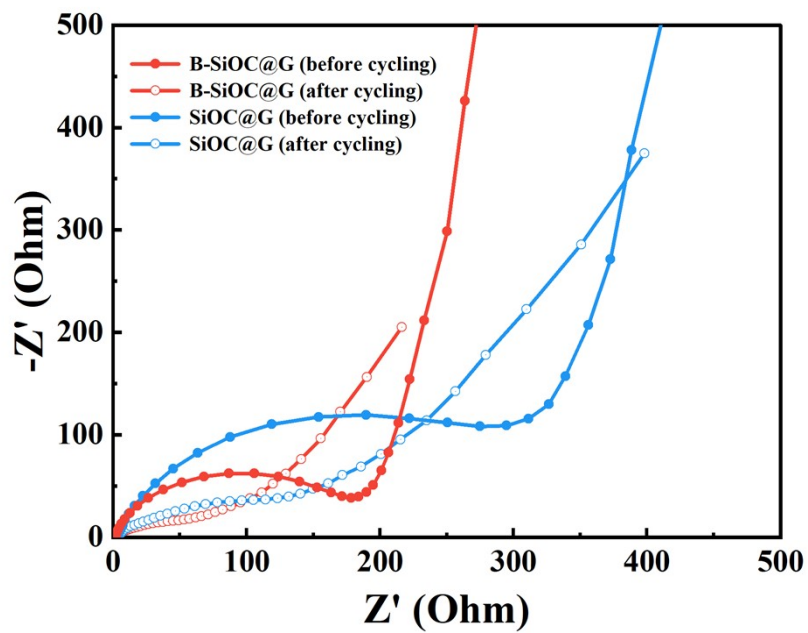

**Figure S6.** Nyquist plots of the B-SiOC@G and SiOC@G samples before and after 500 cycles.

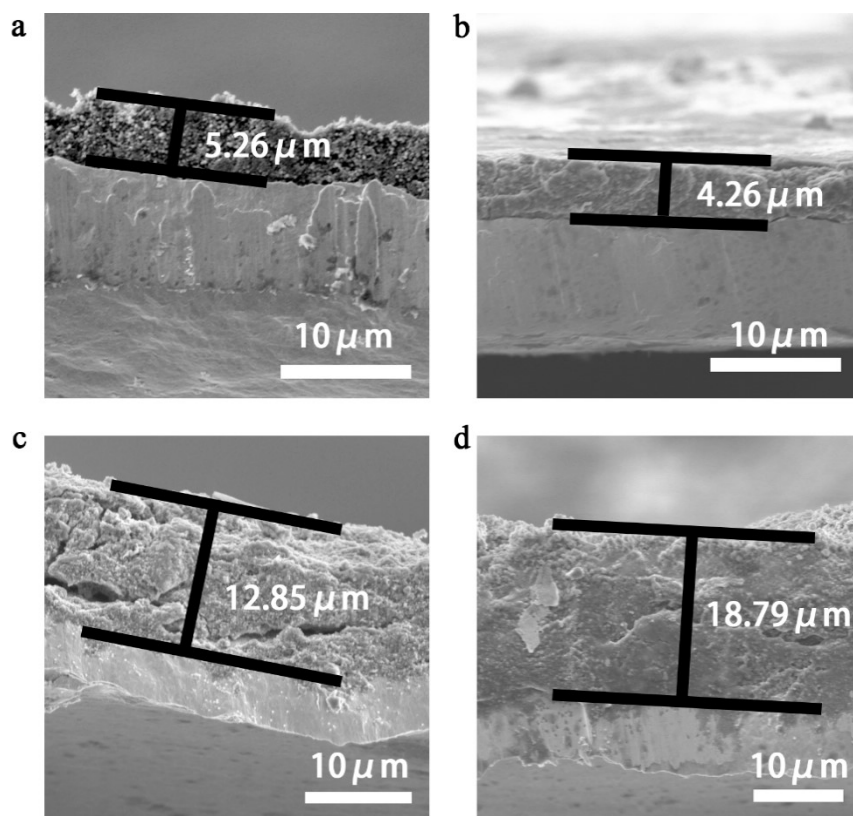

**Figure S7.** Cross-section images of electrode material. (a) Before cycling of B-SiOC@G and (b) SiOC@G. (c) After 500 cycles of B-SiOC@G and (d) SiOC@G.
